# Supplementary figures and images for: Fear of cancer recurrence in adolescent patients with malignant bone tumors: A cross-section survey
Source: Research Square preprint supplement (doi:10.21203/rs.3.rs-3931353/v1), 2024-02-15

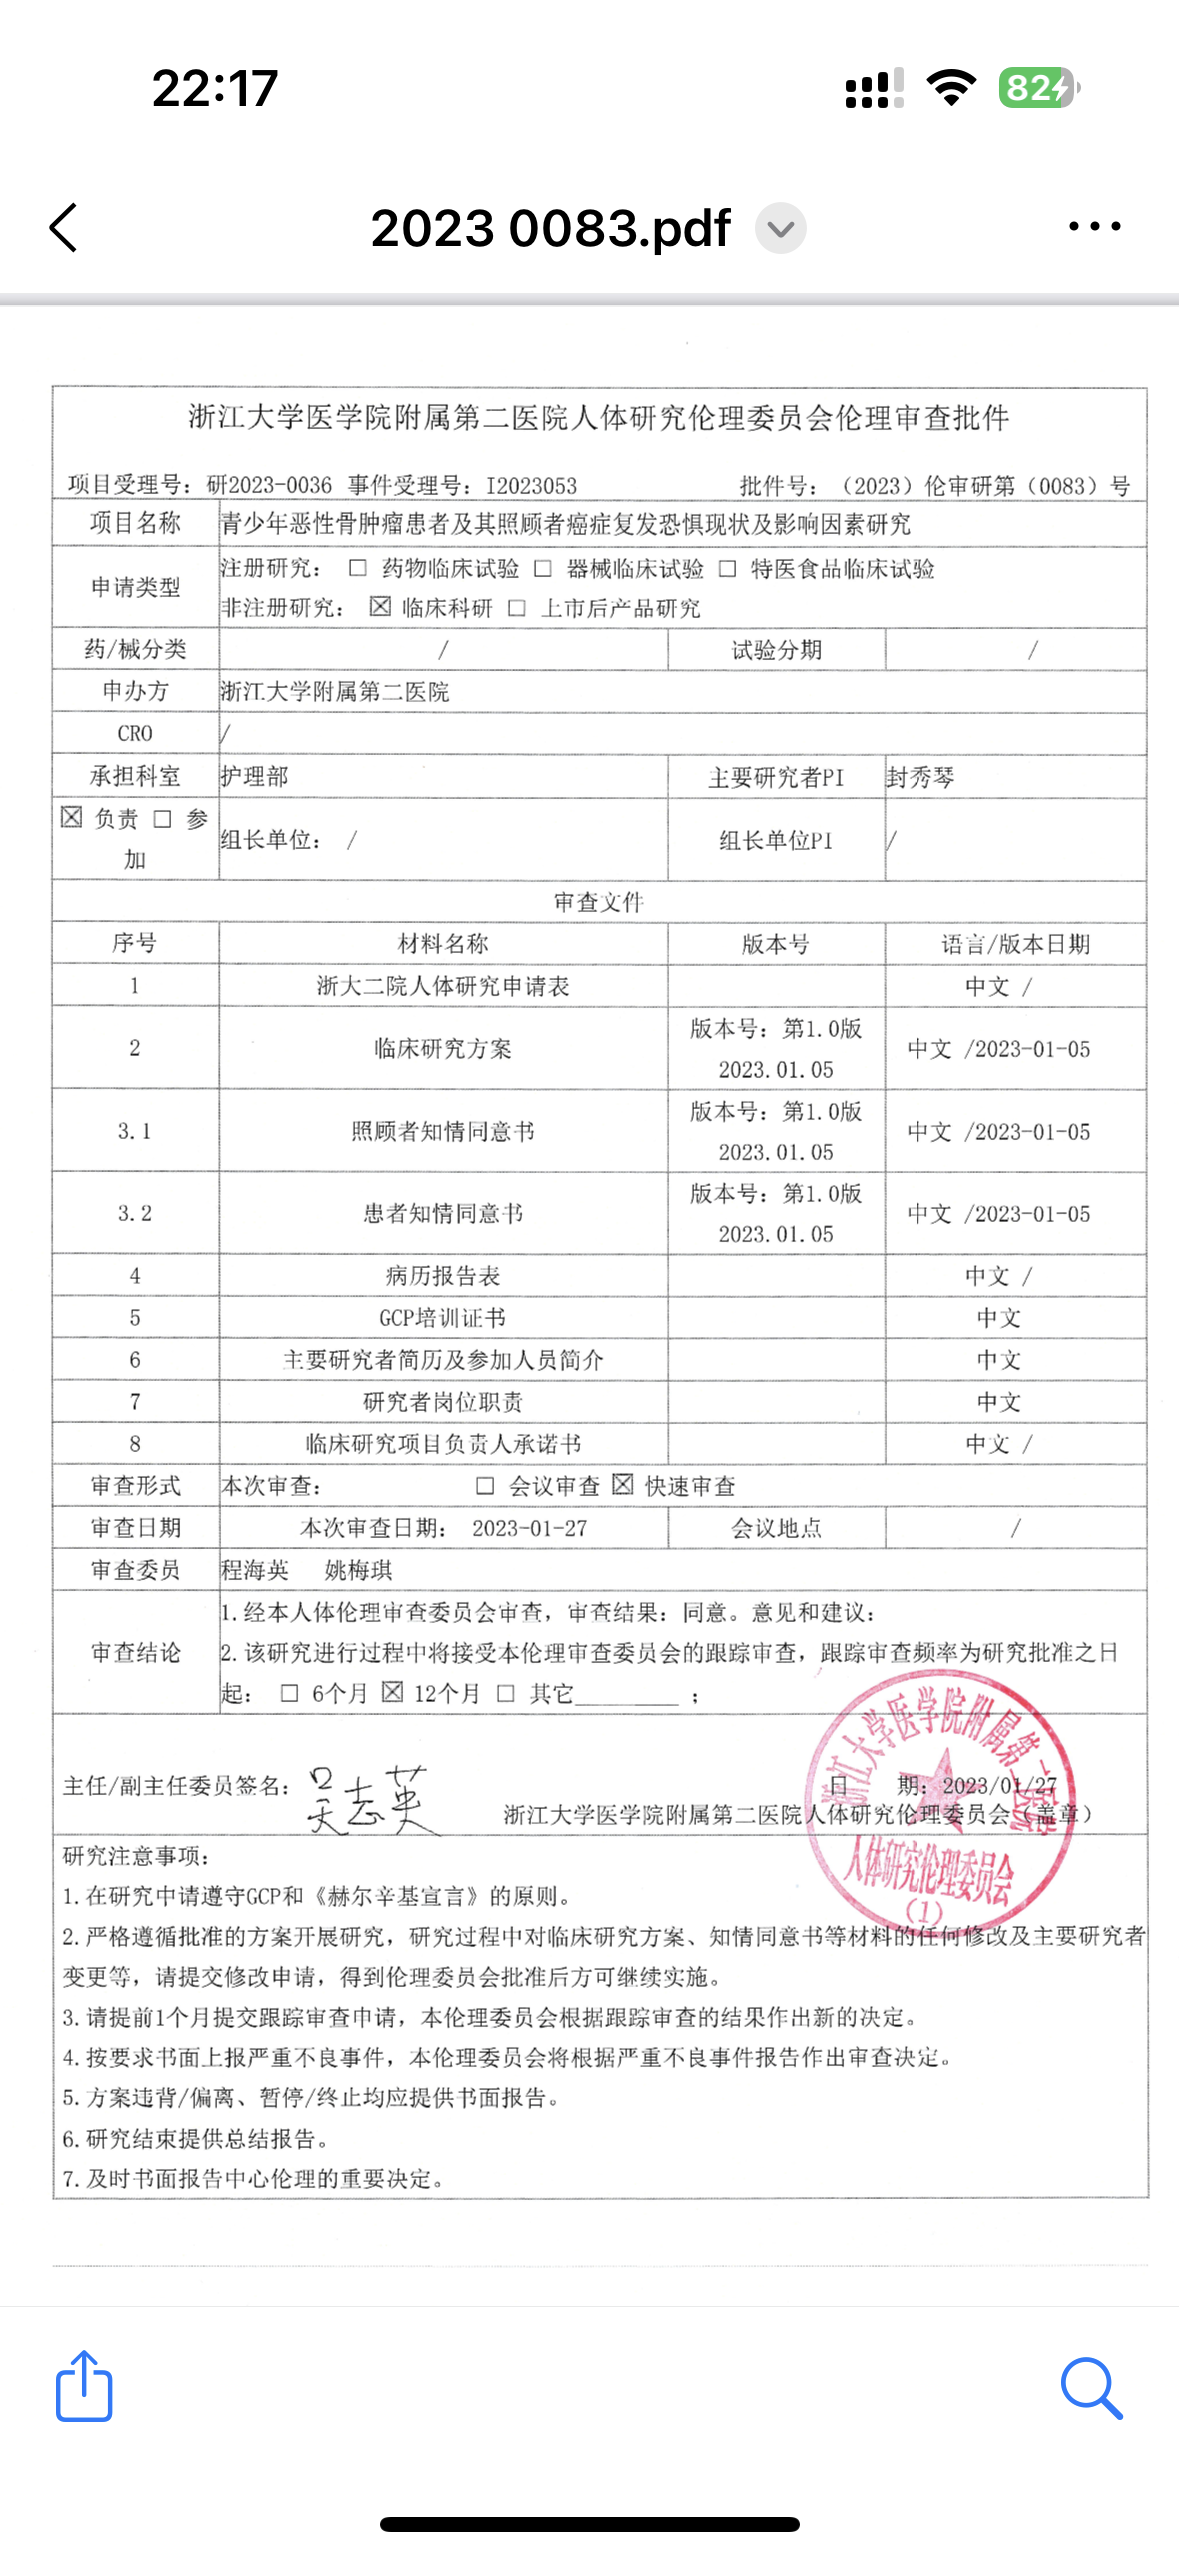

Supplement: Supplementary file 1 [file 1444d06e71fd38859a298d9c.docx]
